# Supplementary material
Source: PubMed Central journal article supplement (PMC8812037)
Supplement: NIHMS1775064-supplement-Supporting_pdf.pdf [file NIHMS1775064-supplement-Supporting_pdf.pdf]

**Supporting Information for**

**“LC-MS/MS for the Detection of DNA Interstrand Cross-links  
Formed by 8-methoxypsoralen and UVA Irradiation in Human Cells”  
by**

Huachuan Cao, James E. Hearst, Laurence Corash and Yinsheng Wang

Anal. Chem. 2008, Volume 80 (ac-2007-023969)

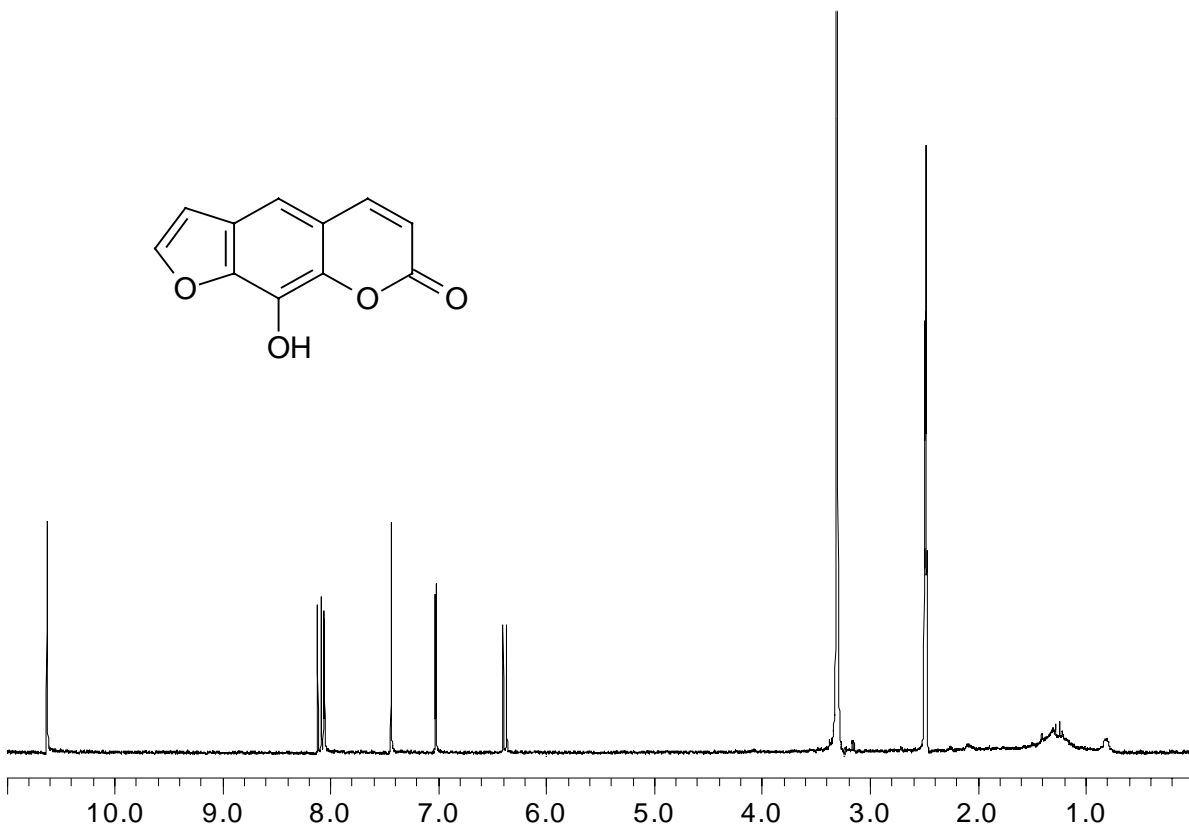

**Figure S1.** <sup>1</sup>H NMR spectrum of 8-OHP (300 MHz, DMSO-*d*<sub>6</sub>). The peaks at 3.3 ppm is attributed to the proton from residual H<sub>2</sub>O and the peak at 2.5 ppm is from the proton in DMSO.

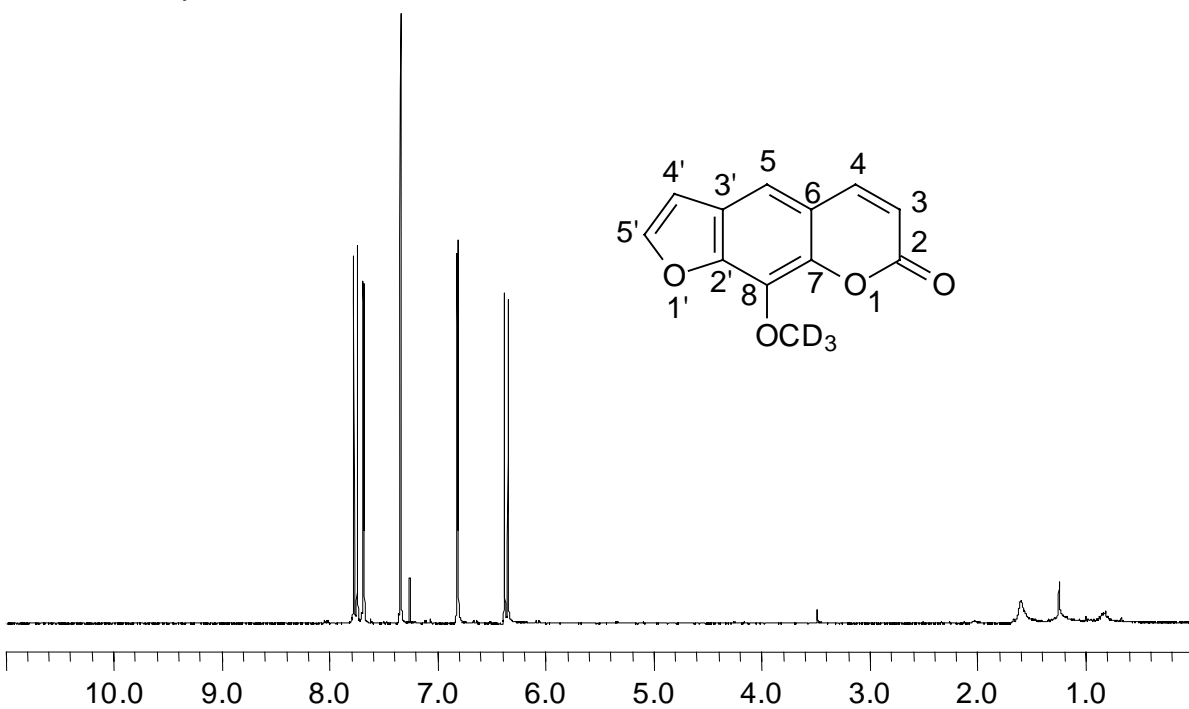

**Figure S2.** <sup>1</sup>H NMR spectrum of D<sub>3</sub>-8-MOP (300 MHz, CDCl<sub>3</sub>).

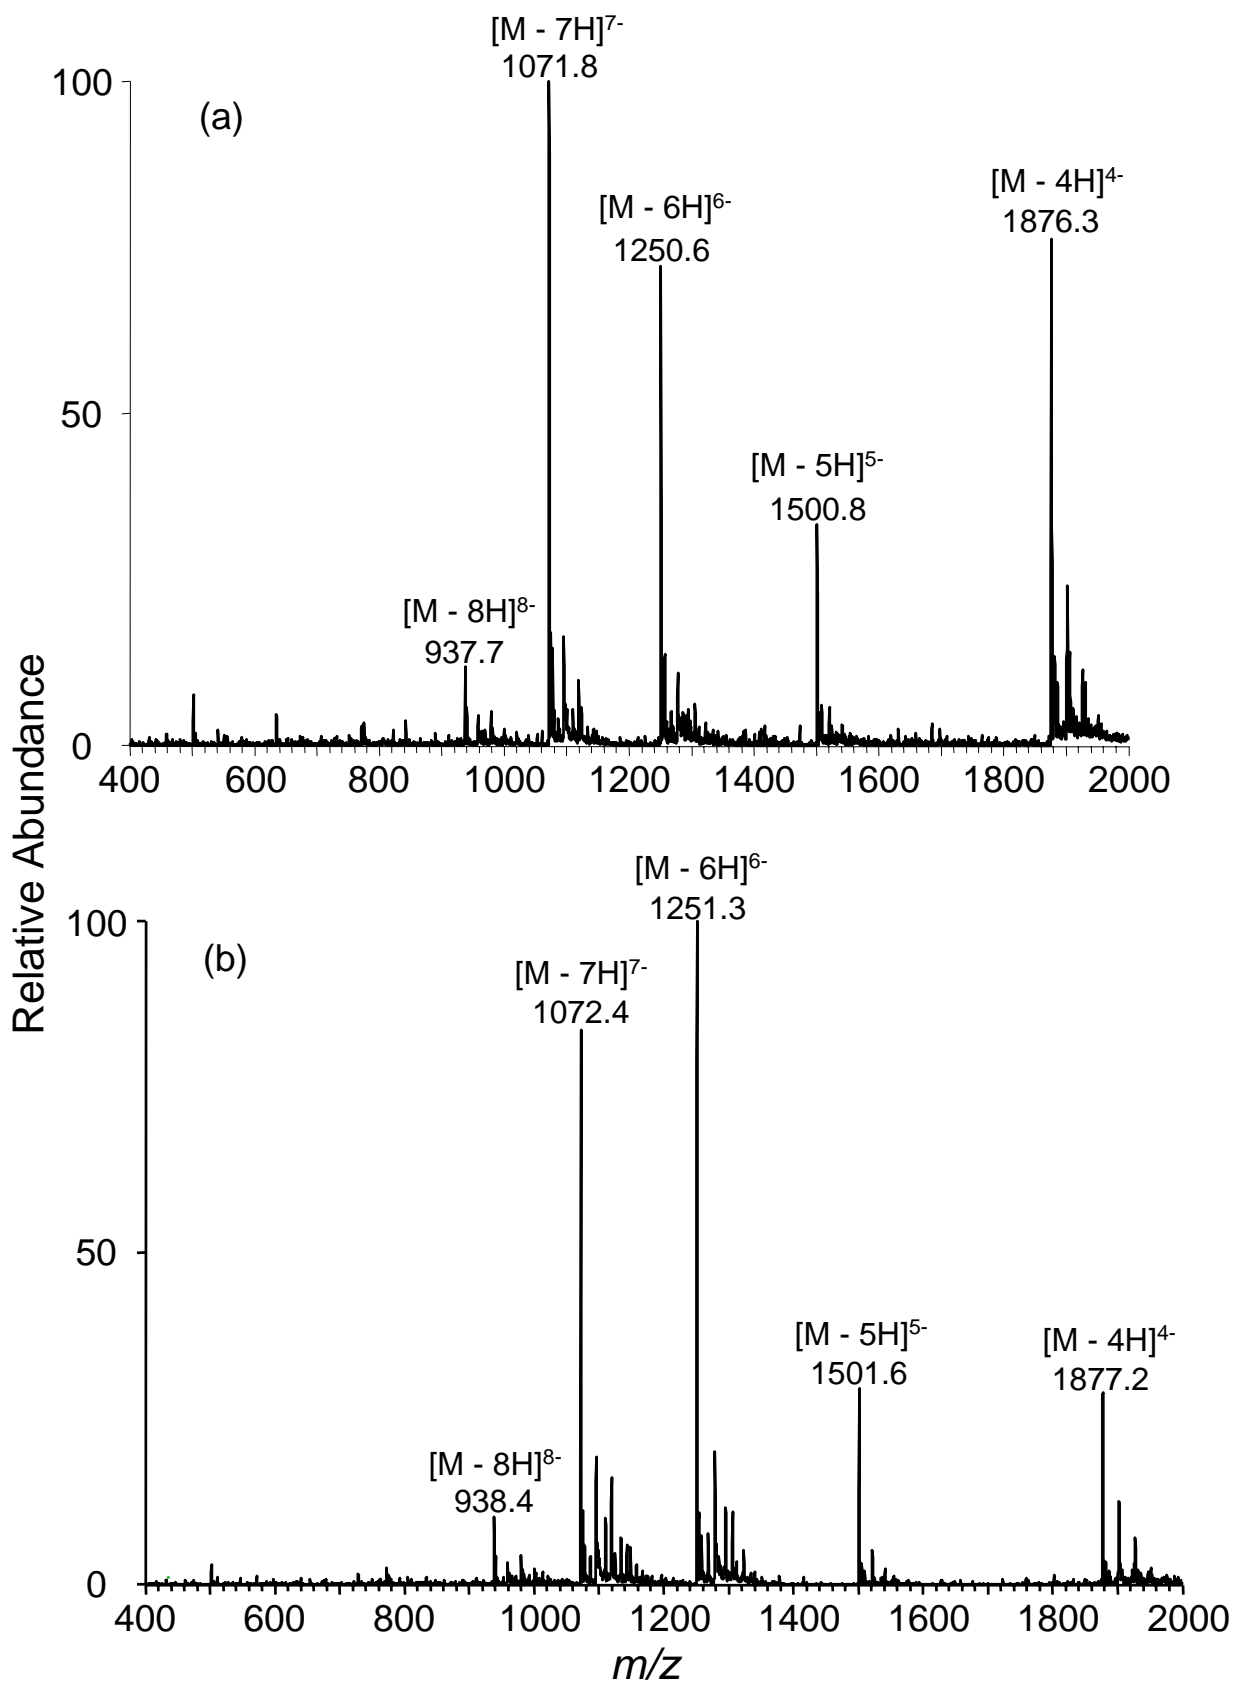

**Figure S3.** ESI-MS of self-complementary duplex ODN d(CGCGTAGCGCG) harboring (a) 8-MOP ICL and (b) D<sub>3</sub>-8-MOP ICL.

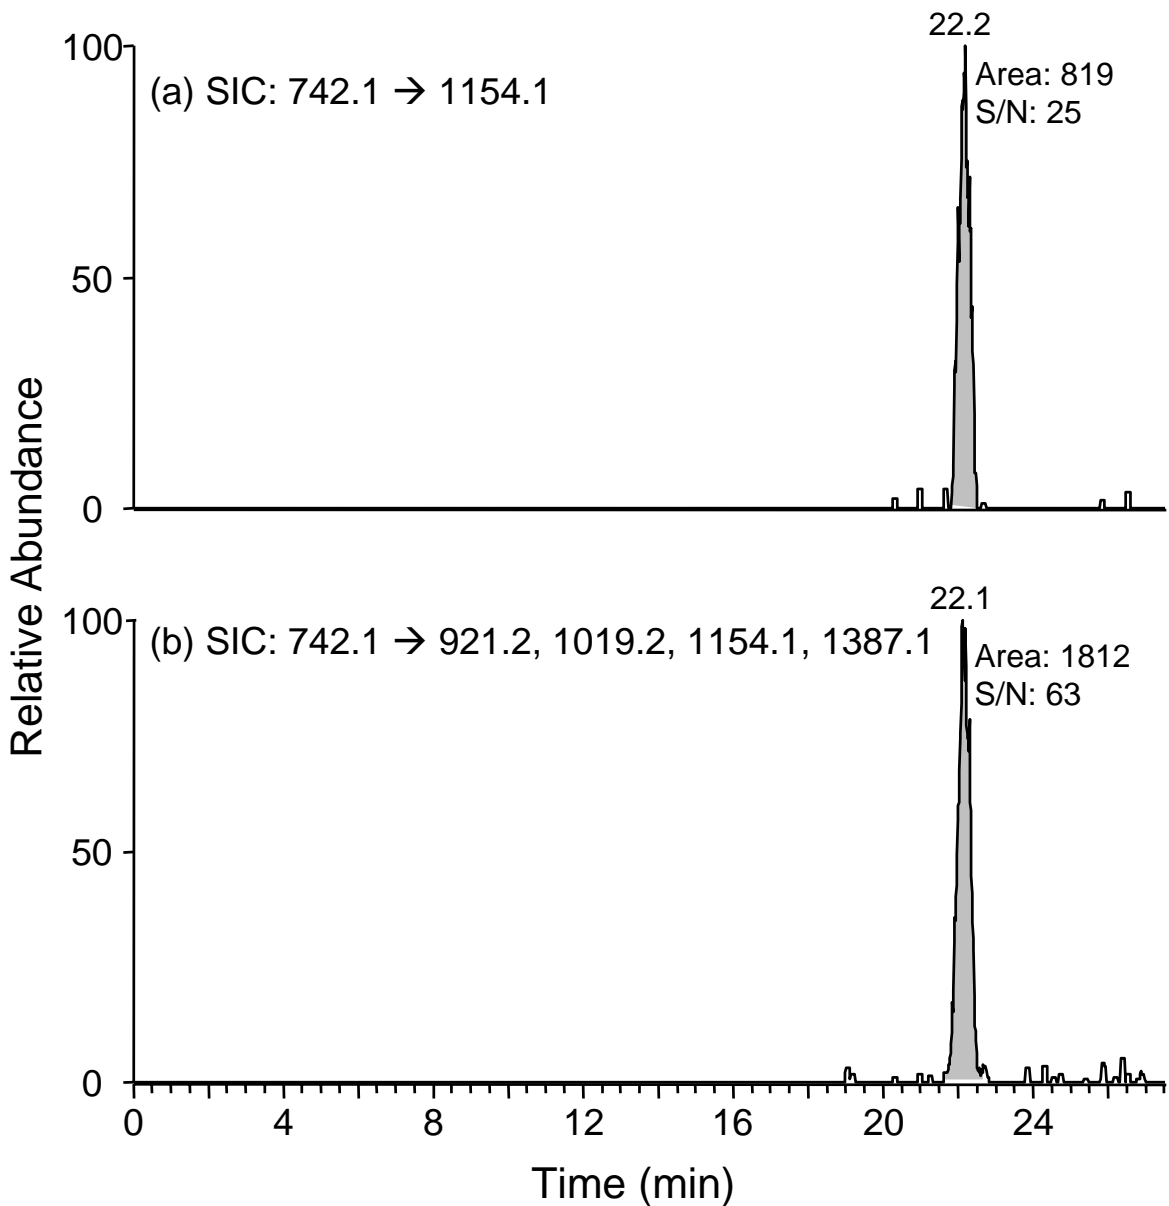

**Figure S4.** SICs for the monitoring of the  $m/z$  742.1  $\rightarrow$   $m/z$  1154.1 (a) and  $m/z$  742.1  $\rightarrow$   $m/z$  921.2, 1019.2, 1154.1, 1387.1 transitions. The sample was the nuclease P1 digestion mixture of a self-complementary duplex ODN d(CGCGTAGCGCG) harboring a 8-MOP ICL. S/N: signal-to-noise ratio.

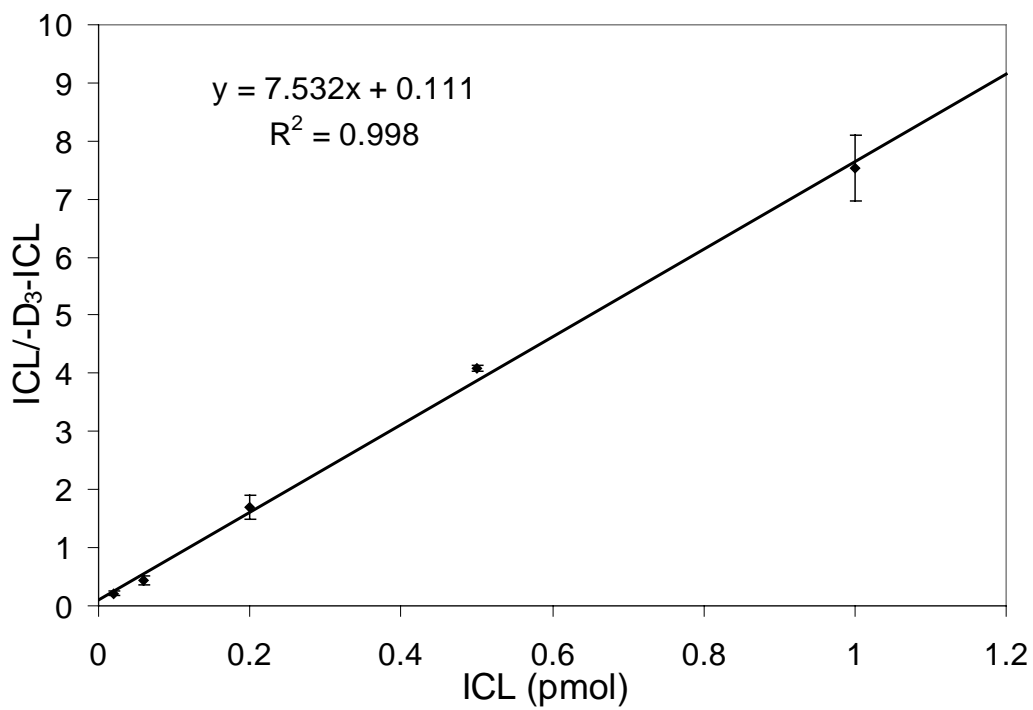

**Figure S5.** Calibration curve for the quantification of 8-MOP-induced ICL.
